# Supplementary material
Source: Springer Nature journal article supplement (https://www.springermedizin.de/resource/supplementary/12967_2013_1759_MOESM8_ESM.pdf/9575252)

**A:** Distribution of microRNAs with different NOD values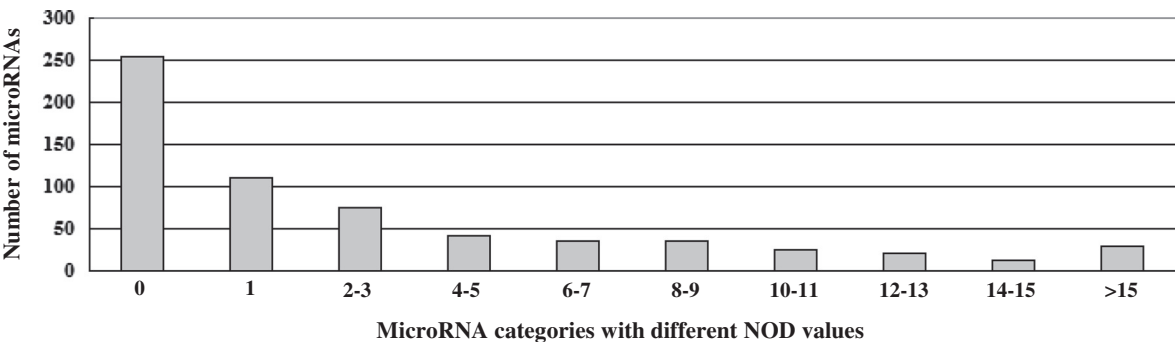**B:** Schematic explanation of miRNA-mRNA regulation types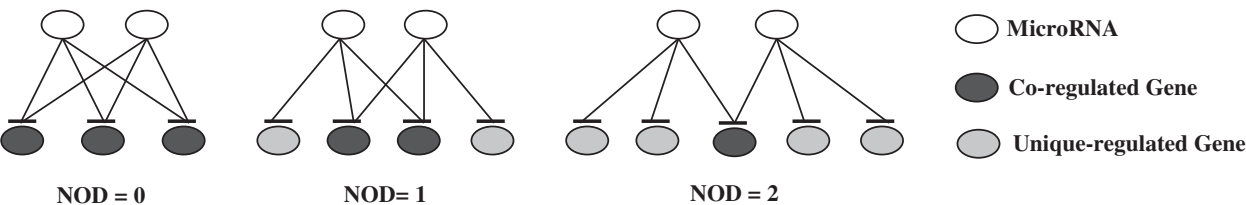**C:** Literature reported cancer miRNA biomarkers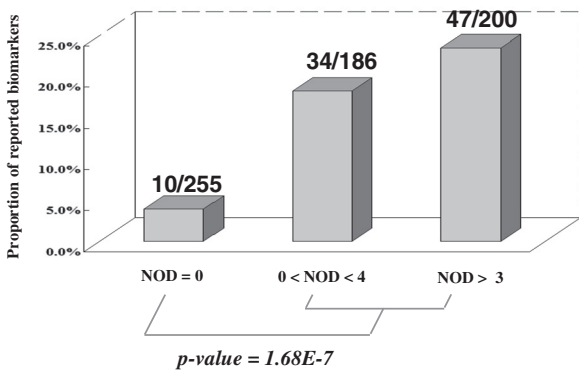**D:** Cancer DE miRNAs from low-throughput methods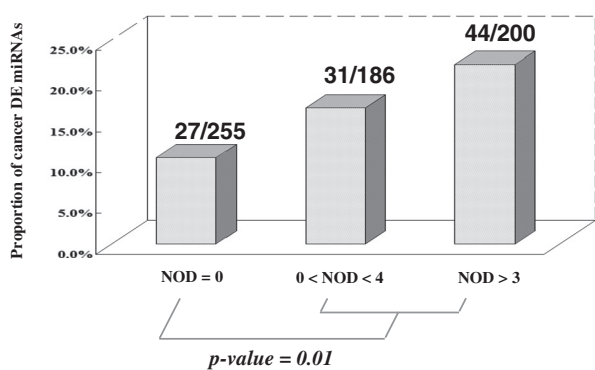

Supplement: MOESM8 [file 9575252]
